# Supplementary material
Source: PubMed Central journal article supplement (PMC4337465)
Supplement: Supp_Fig1.pdf [file Supp_Fig1.pdf]

## Supplementary Data

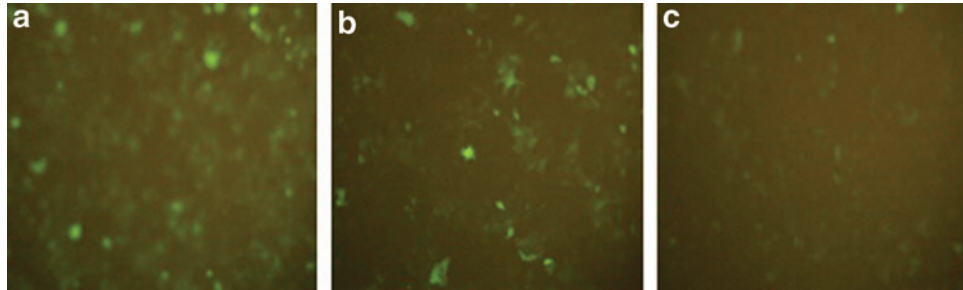

**SUPPLEMENTARY FIG. S1.** GFP expression after infection of cells with final vector preparations. A549 cells were cultured and infected with 10  $\mu$ l of the respective final vector preparation. Pictures were taken 48 hr after infection. Virus was purified using three different commercially available purification systems: (a) cells infected with virus purified by the Millipore system, (b) pictures after infection of cells with virus prepared by the Cellbiolabs system, and (c) virus purified using the Clontech column system.
