# Supplementary material
Source: PubMed Central journal article supplement (PMC4337465)
Supplement: Supp_Fig2.pdf [file Supp_Fig2.pdf]

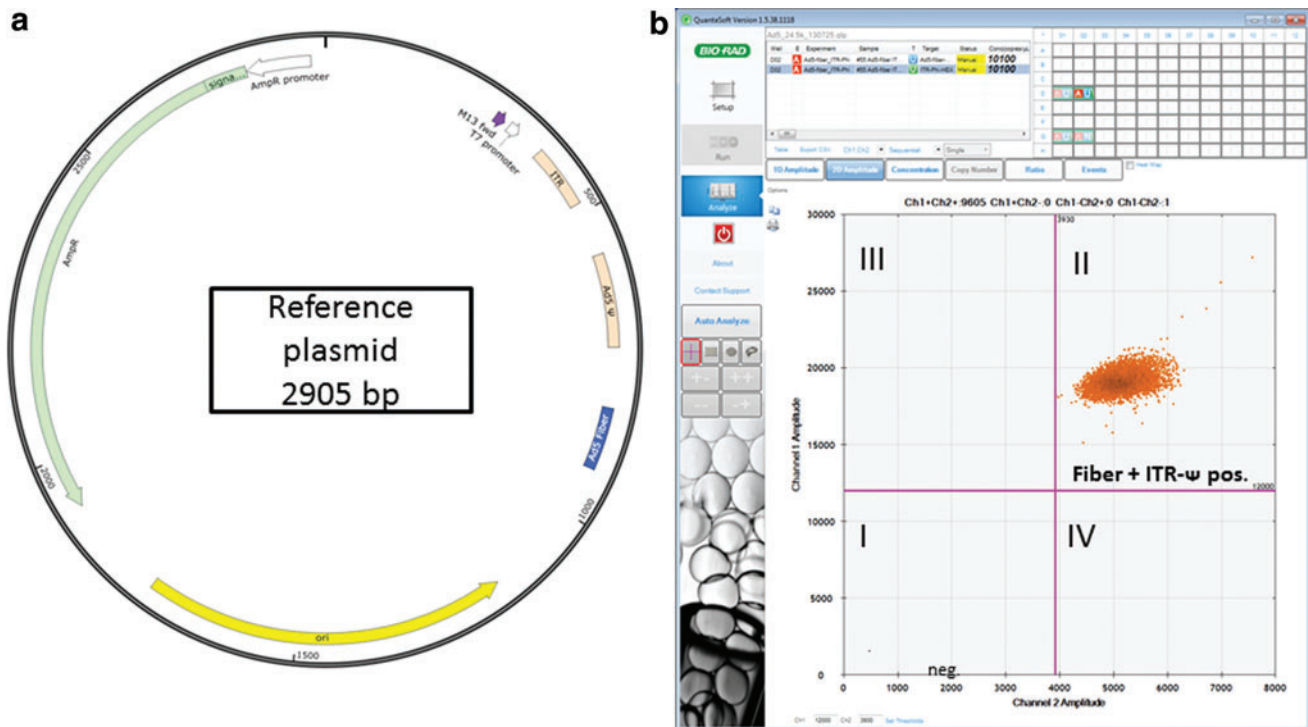

**SUPPLEMENTARY FIG. S2.** Establishment of the droplet digital PCR (ddPCR) using a reference plasmid. (a) The reference plasmid pMA-Ad5-ITR/ $\Psi$ -fiber was used as an internal quality control. This plasmid contains both target sequences (inverted terminal repeat, the packaging signal, and the fiber region) for the ddPCR. (b) The sensitivity and specificity of our new ddPCR approach were tested with the reference plasmid. As expected, there is only a double-positive signal in quadrant two measuring fiber using PCR setup IV and ITR- $\Psi$  using PCR setup III, since both targets are present on the same plasmid. Note that no background signals are present.  $\Psi$ , packaging signal.
