# Supplementary material
Source: PubMed Central journal article supplement (PMC4337465)
Supplement: Supp_Fig3.pdf [file Supp_Fig3.pdf]

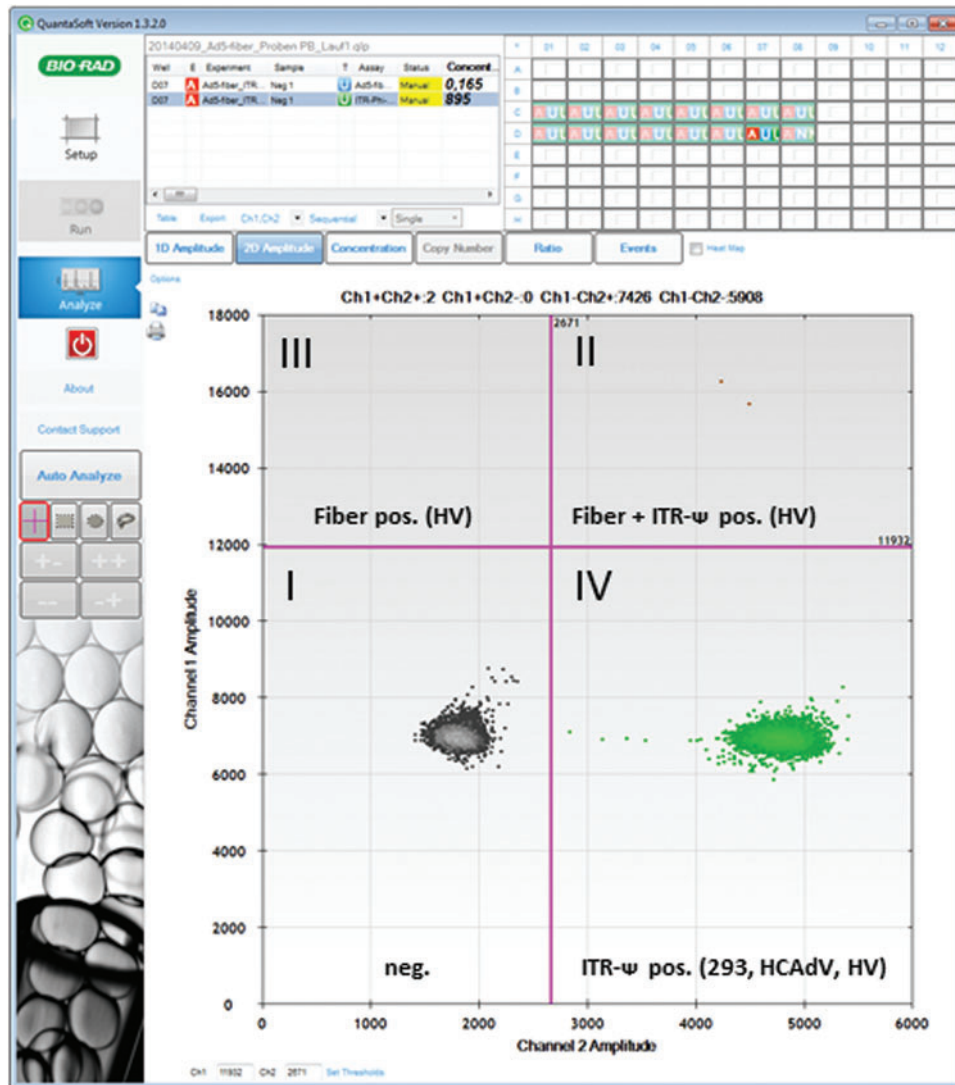

**SUPPLEMENTARY FIG. S3.** Principle of the raw data analysis provided by the ddPCR using the software QuantaSoft provided by Bio-Rad. This dataset was obtained after titration in HEK293 cells, which have by nature integrated adenoviral inverted terminal repeat and packaging signal DNA sequences (ITR- $\Psi$ ). Therefore, these cells gave a strong signal in quadrant IV detecting ITR- $\Psi$  DNA sequences in the HCAdV, the helper virus (HV), and HEK293 cells. Quadrant I displays the negative control group (neg.), quadrant II shows PCRs positive for fiber and ITR- $\Psi$  sequences, and quadrant III shows droplets positive for fiber PCR contained in the HV.
